# Supplementary material
Source: Research Square preprint supplement (doi:10.21203/rs.3.rs-9307876/v1)

**Supplementary Figures**

*For: An ET-dependent VPD threshold frontier of cropland water–carbon coupling and its modulation by deep soil water under salinized irrigation*

Supplementary Figure S1. Monthly evolution of ET, GPP, mean VPD excess, and exceedance frequency during the growing season.


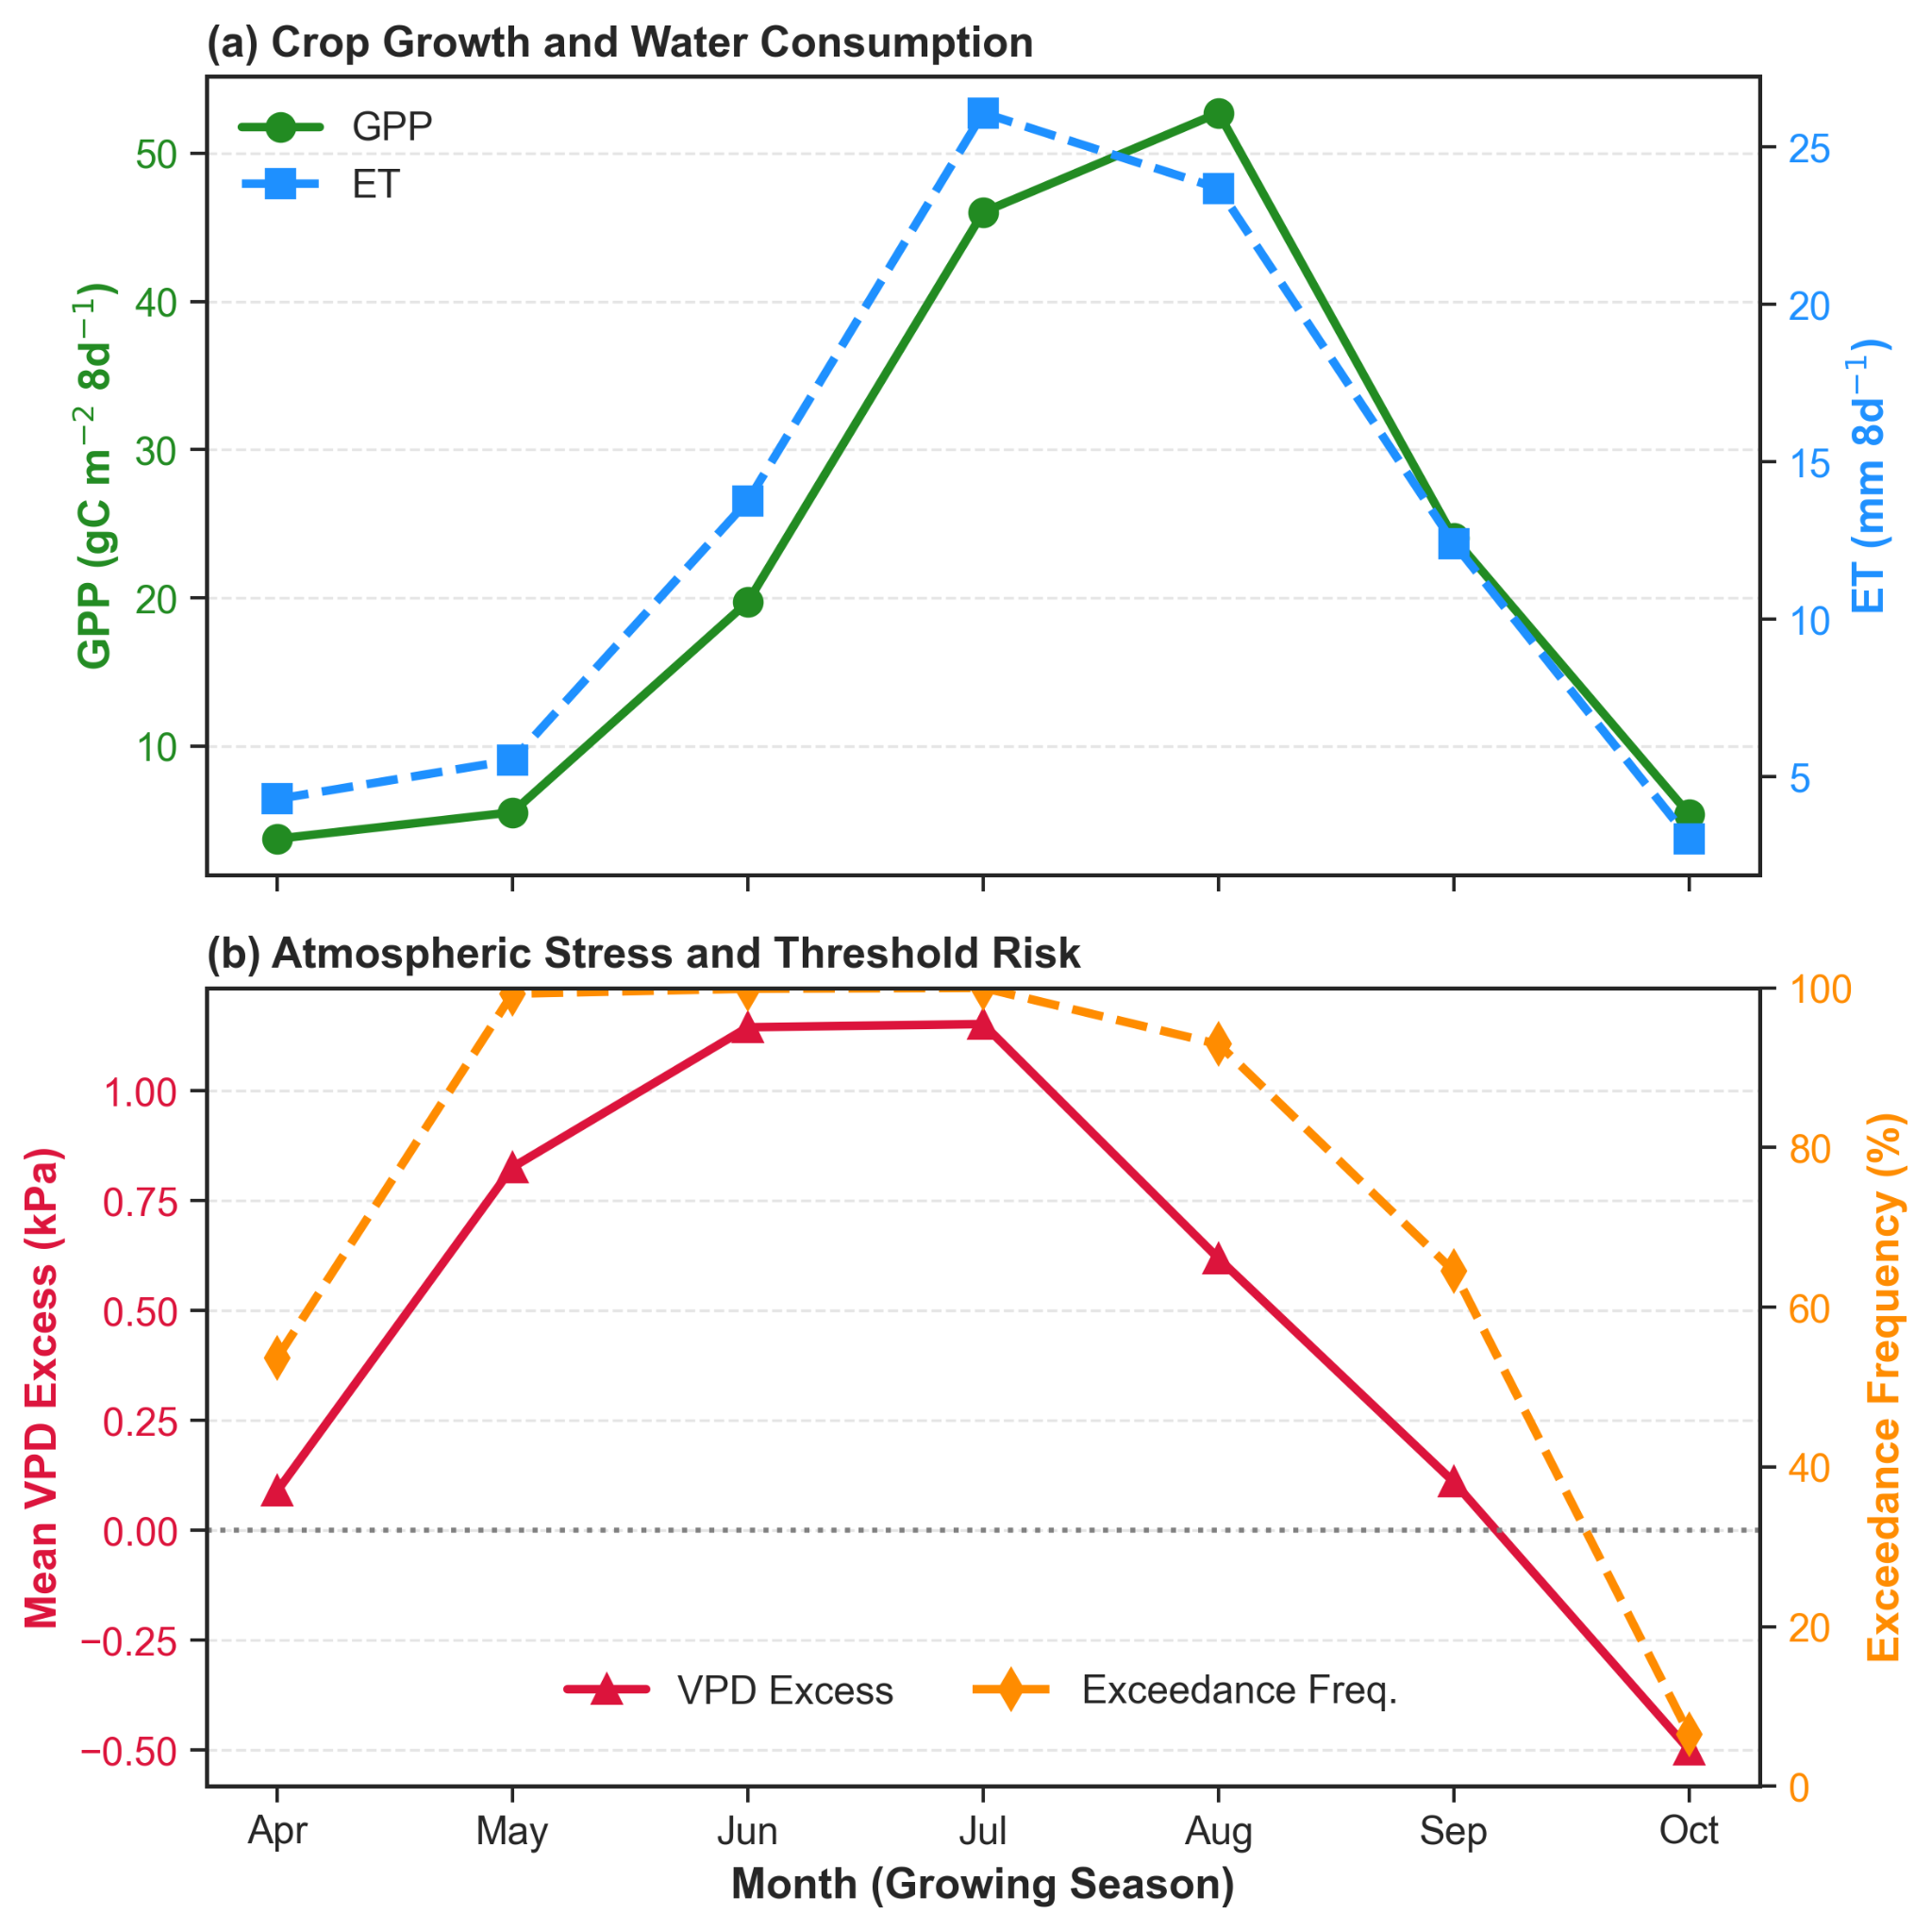


Supplementary Figure S2. Joint density distribution of ET and VPD.


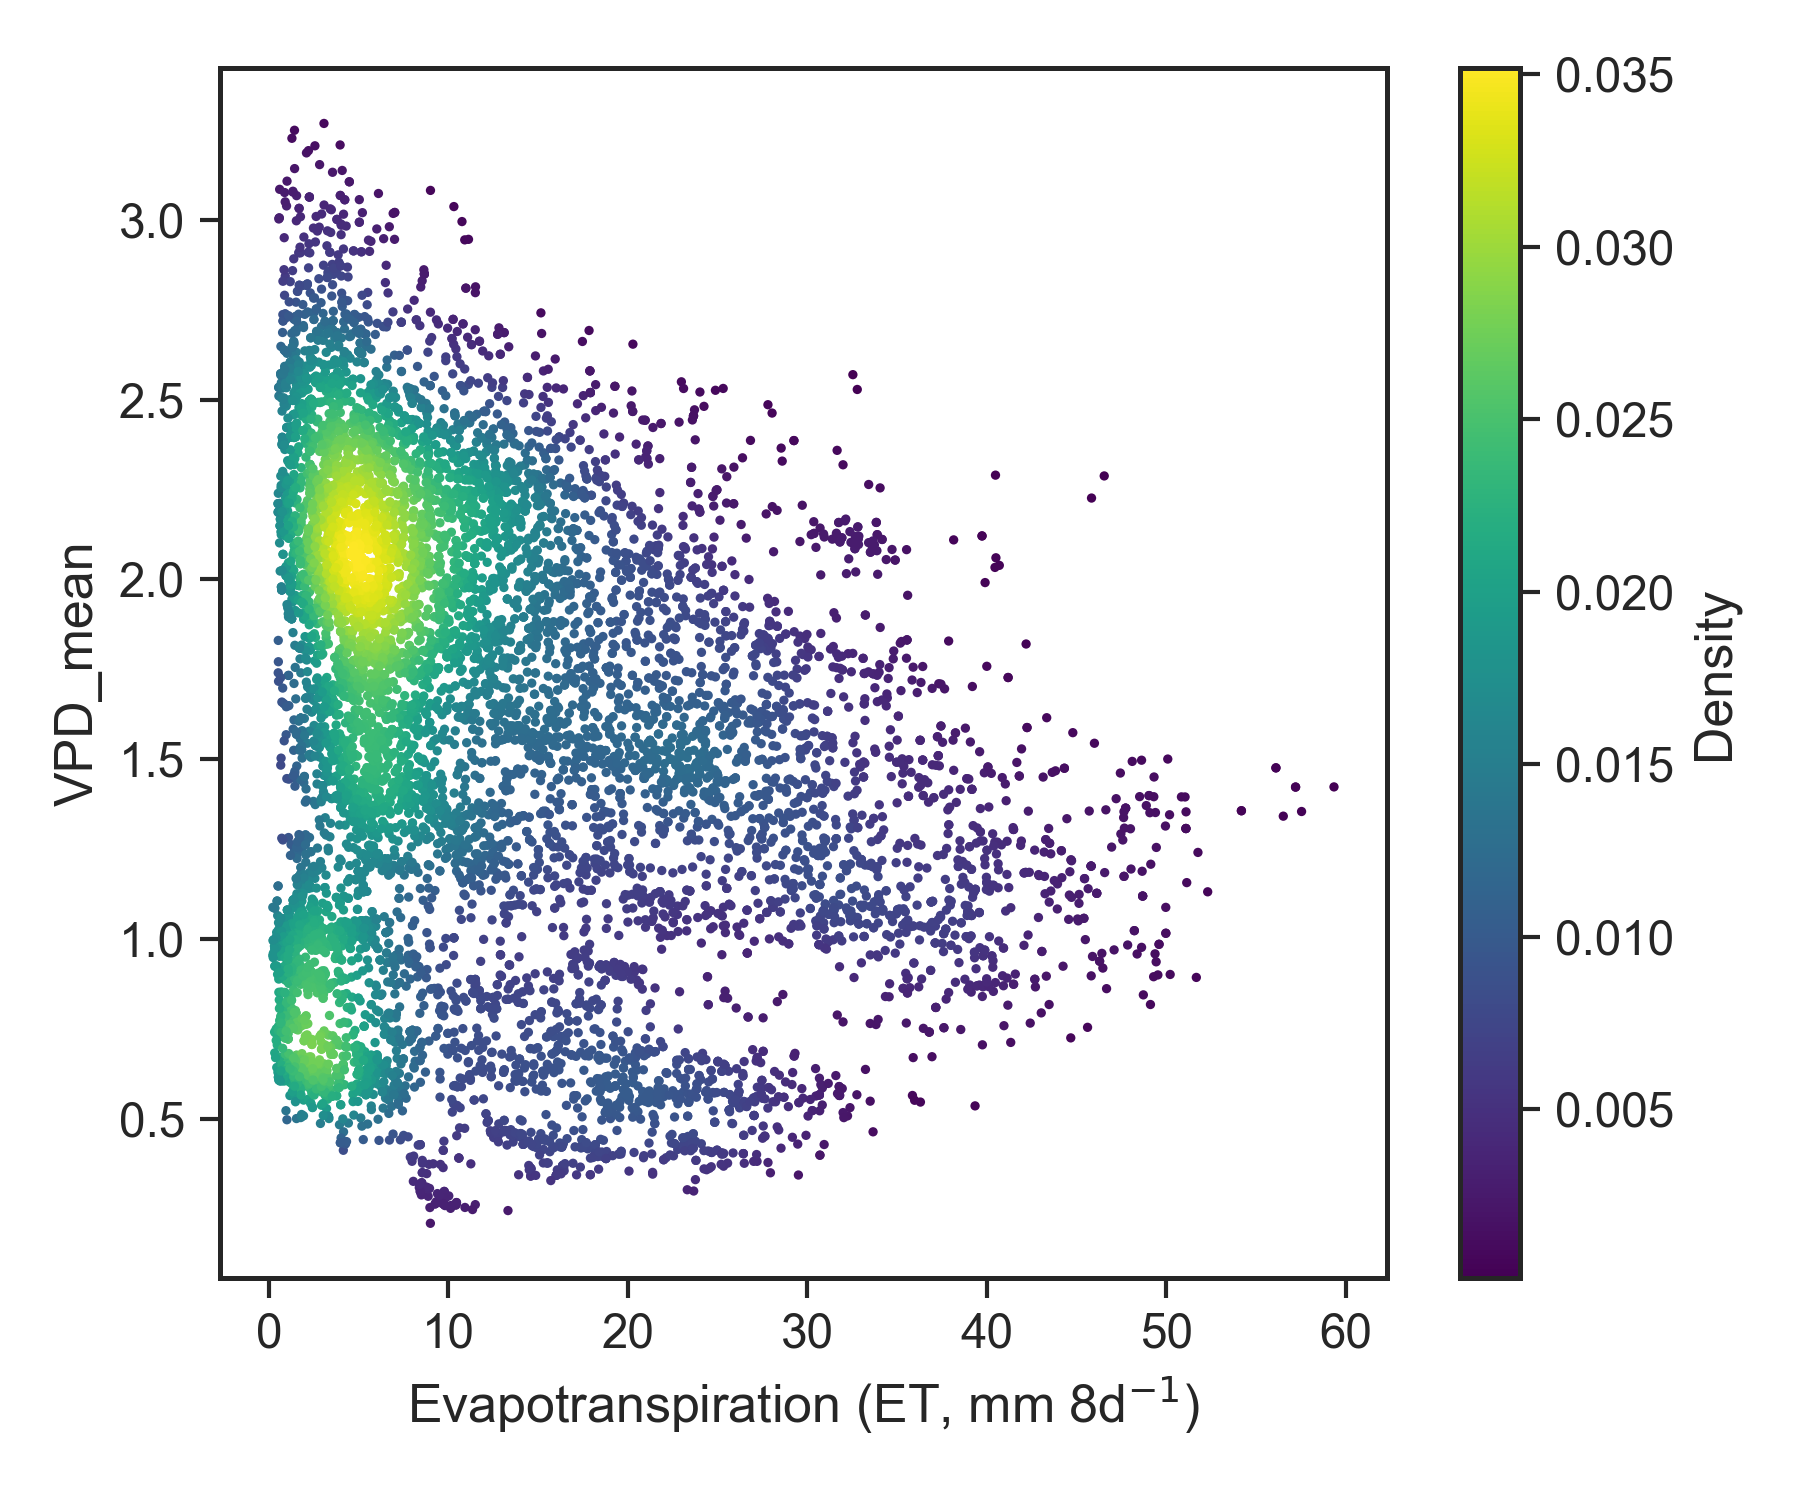


Supplementary Figure S3. Joint density distribution of ET and deep soil water availability index (DSWI).


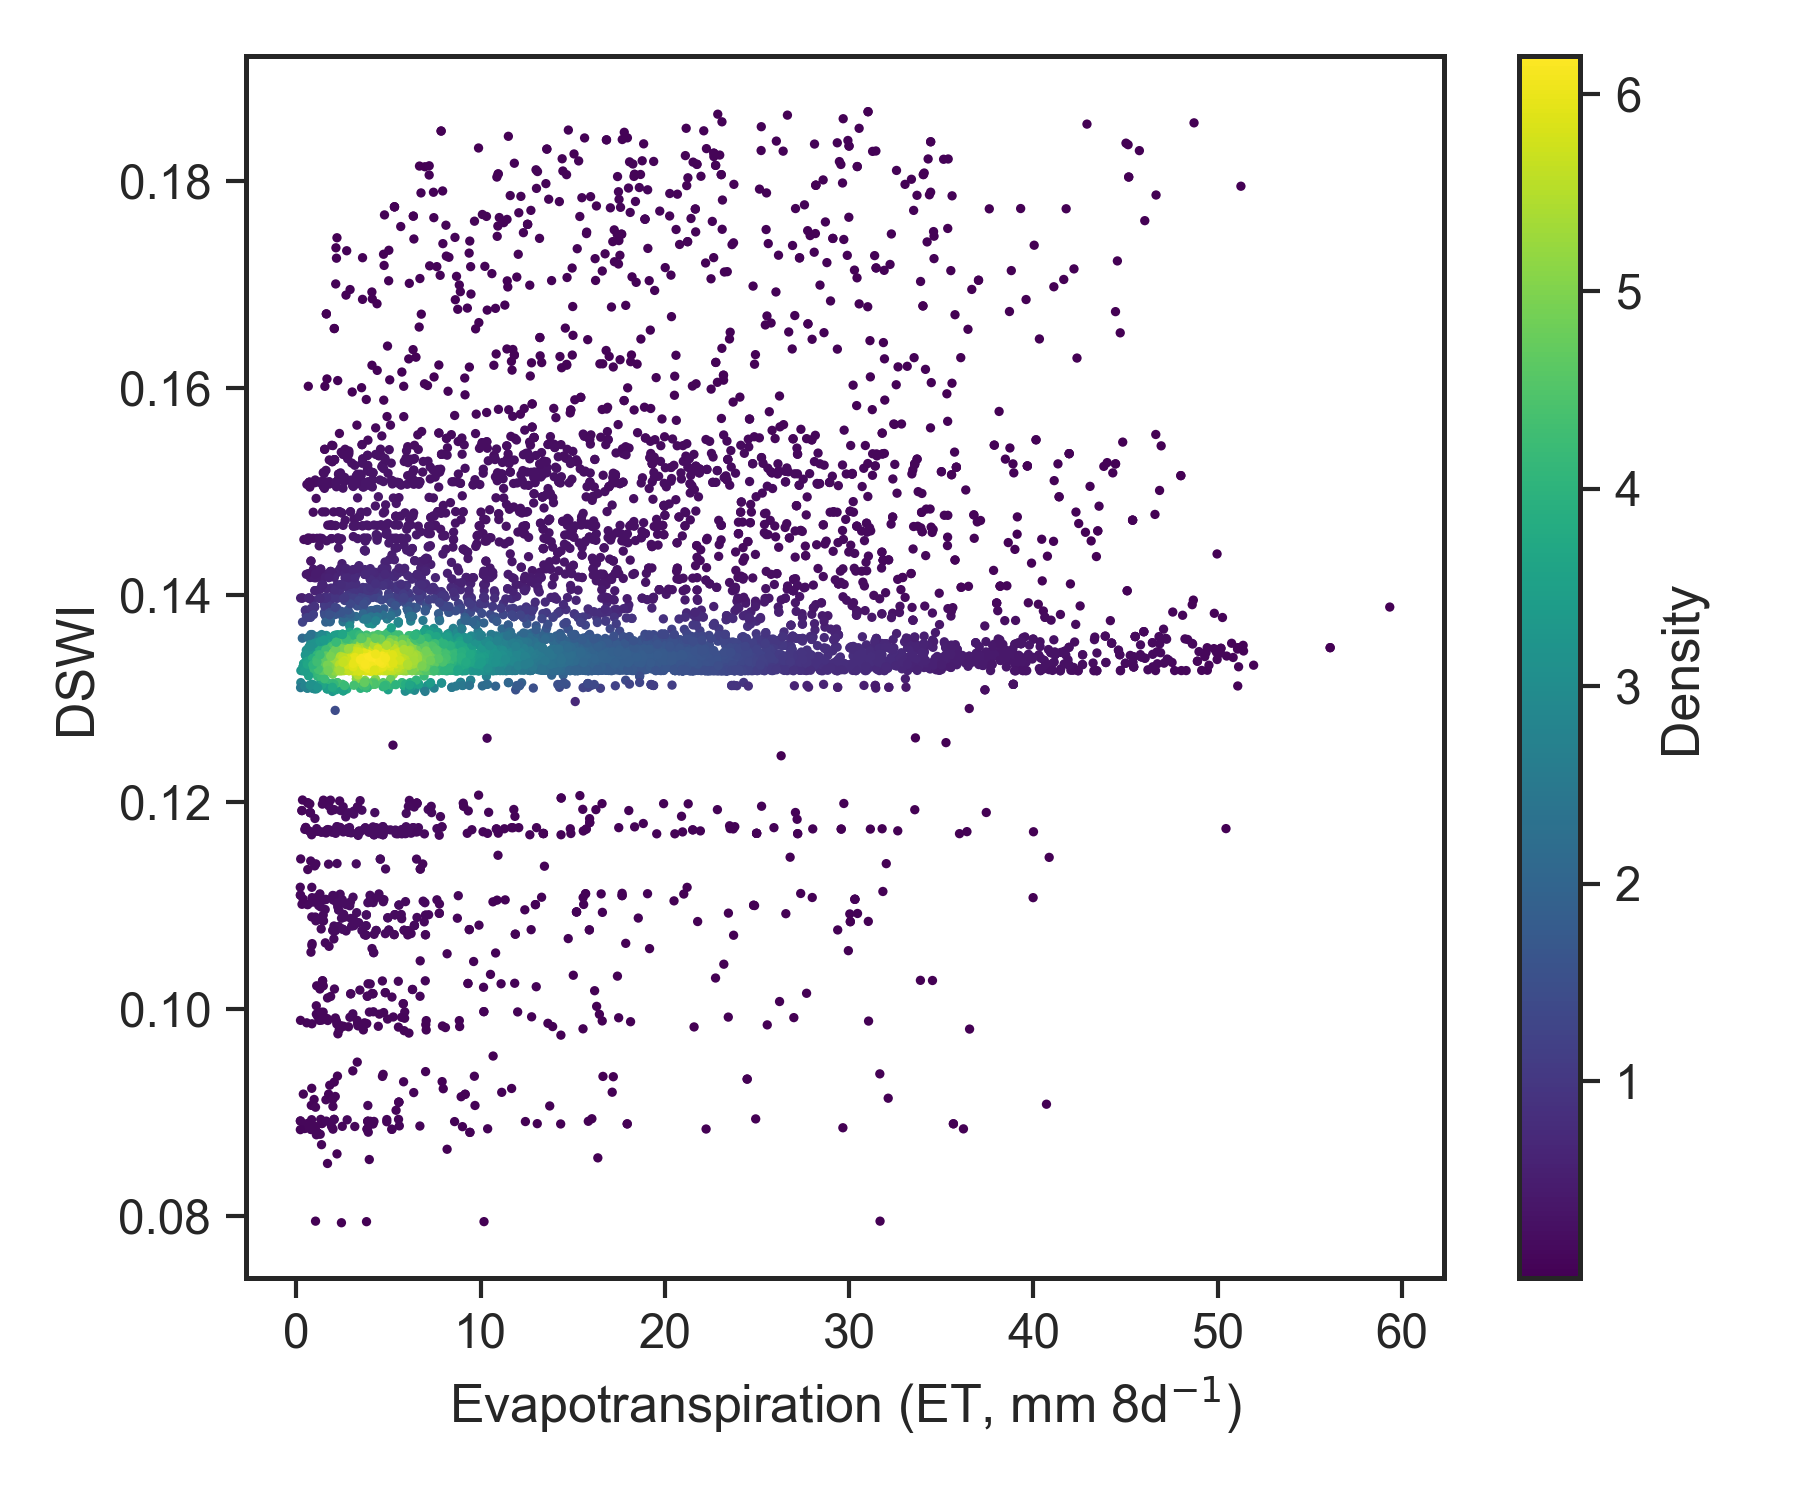

Supplement: Supplementary file 1 [file 97c0e0fbcc586eadf8d0baad.docx]
